# Supplementary material for: Amidoxime functionalization of mesoporous silica and its high removal of U(vi)
Source: Royal Society of Chemistry journal article supplement (doi:10.1039/c5py00540j), 2015-01-01
Supplement: c5py00540j1.pdf [file c5py00540j1.pdf]

## Electronic Supplementary Information

# Amidoxime functionalization of mesoporous silica and its high removal of U(VI)

Yingguo Zhao<sup>ab</sup>, Xiangxue Wang<sup>a</sup>, Jiaying Li<sup>\*a,c</sup>, Xiangke Wang<sup>ade\*</sup>

<sup>a</sup> School of Environment and Chemical Engineering, North China Electric Power University, Beijing 102206, P.R. China. Fax: +86-10-61772890; Tel: +86-10-61772890; E-mail: lijx@ipp.ac.cn (J. Li); xkwang@ipp.ac.cn or xkwang2ncepu.edu.cn (X. Wang)

<sup>b</sup> Anhui Collaborative Innovation Center for Petrochemical New Materials, Anqing Normal College, Anqing 246011, PR China

<sup>c</sup> School for Radiological and interdisciplinary Sciences (RAD-X), Soochow University, P.R. China

<sup>d</sup> Collaborative Innovation Center of Radiation Medicine of Jiangsu Higher Education Institutions, P.R. China

<sup>e</sup> NAAM Research Group, Faculty of Science, King Abdulaziz University, Jeddah 21589, Saudi Arabia

## **Experimental procedures**

### **Kinetic experiments**

For batch kinetic tests, the initial U(VI) concentrations was 0.2 mmol/L and the initial solution pH value was 5.0 (the solution pH was not adjusted during the sorption kinetic process). The centrifuge tubes were gently shaken on a rotating oscillator for a series of preselected contact time ranging from 5 to 360 min. The residual U(VI) concentrations were determined after centrifugation.

### **Regeneration experiments**

For desorption experiments, the solid residue of sorption experiments was thoroughly rinsed with Milli-Q water and mixed with HCl solutions at 298 K under vibrating condition for 24 h. After centrifugation, the remaining U(VI) concentration in the supernatant was measured to evaluate the desorption percentage. The regenerated sorbent was washed thoroughly with Milli-Q water and then used for the next sorption-desorption cycle.

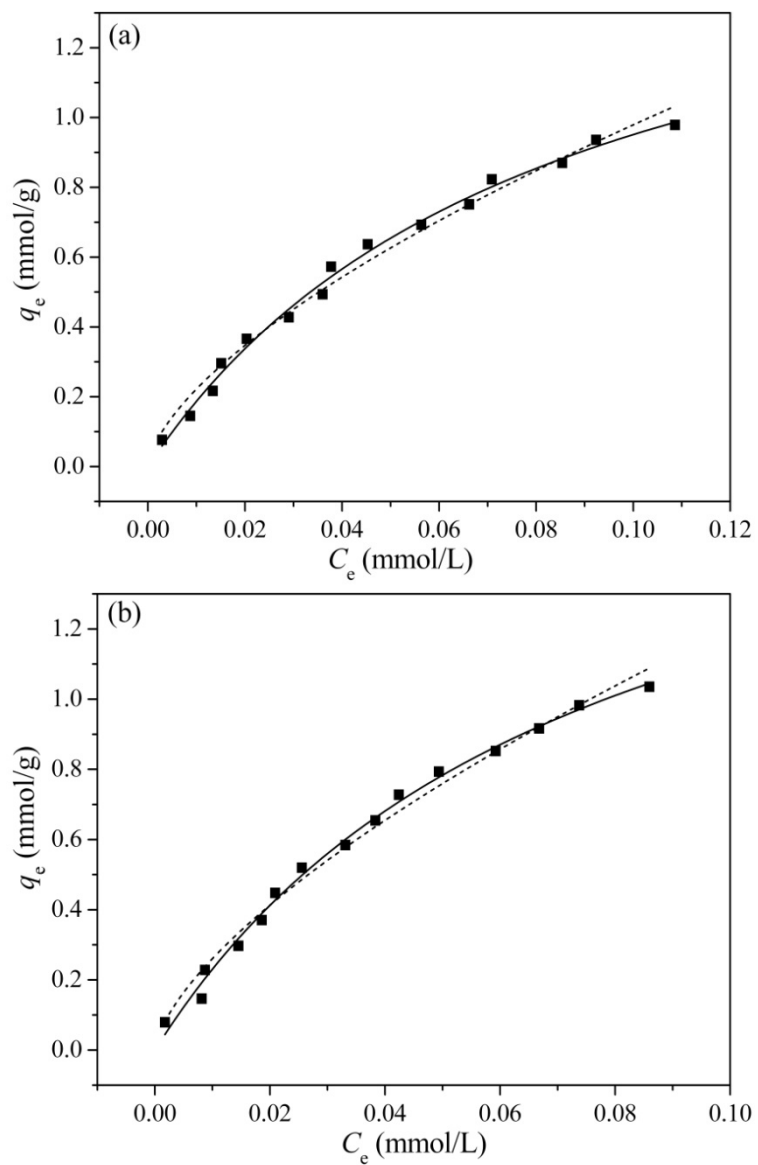

Fig. S1 Sorption isotherms of U(VI) on SBA-AO-0.4 at 313 K (a) and 333 K (b). The scattered points represent experiment data, the solid lines represent the Langmuir model and the dash lines represent the Freundlich model.

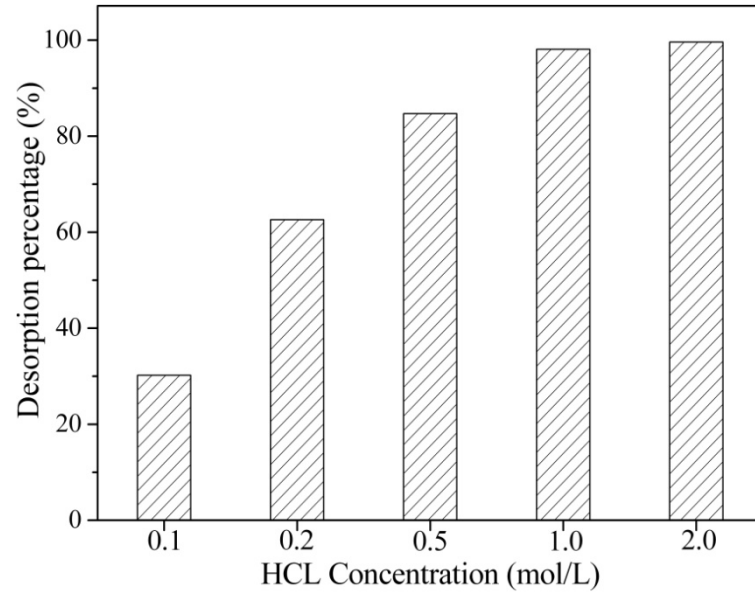

Fig. S2. Effect of HCL concentration on U(VI) desorption.  $T = 298 \text{ K}$ ,  $m/V = 0.2 \text{ g/L}$ .

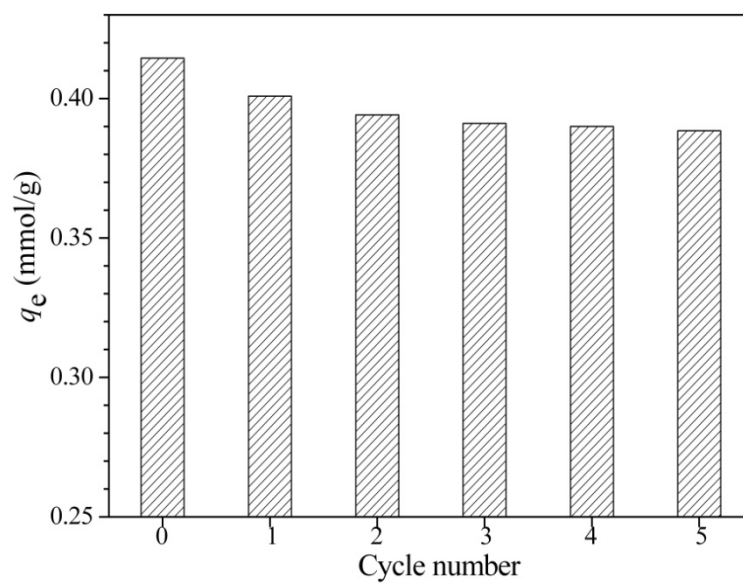

Fig. S3 Recycling of SBA-AO-0.4 in the sorption of U(VI). pH =  $5.0 \pm 0.1$ ,  $T = 298$  K,  $I = 0.01$  M  $\text{NaClO}_4$ ,  $C_{\text{U(VI) initial}} = 0.2$  mmol/L,  $m/V = 0.2$  g/L.

Table S1 Comparison of U(VI) sorption capacity of SBA-AO-0.4 with other sorbents

| Sorbents                                                          | Experimental conditions          | $q_{\max}$ (mg/g) | Ref       |
|-------------------------------------------------------------------|----------------------------------|-------------------|-----------|
| Colloidal magnetite                                               | ambient temperature,<br>pH = 7.0 | 1.4               | 1         |
| Fe <sub>3</sub> O <sub>4</sub> /graphene oxide                    | $T = 293\text{K}$ , pH = 5.5     | 69.5              | 2         |
| Fe <sub>3</sub> O <sub>4</sub> @SiO <sub>2</sub> -Salicylaldehyde | ambient temperature,<br>pH = 7.0 | 49.0              | 3         |
| Fe <sub>3</sub> O <sub>4</sub> @SiO <sub>2</sub> -Quercetin       | $T = 298\text{K}$ , pH = 3.7     | 12.3              | 4         |
| Fe <sub>3</sub> O <sub>4</sub> @SiO <sub>2</sub> -Amidoxime       | $T = 298\text{K}$ , pH = 5.0     | 105.0             | 5         |
| Polymeric-magnetite<br>cryobead                                   | $T = 298\text{K}$ , pH = 5.0     | 120.5             | 6         |
| Fe <sub>3</sub> O <sub>4</sub> @IIP                               | ambient temperature,<br>pH = 4.0 | 71.5              | 7         |
| Fe <sub>3</sub> O <sub>4</sub> @SiO <sub>2</sub>                  | $T = 298\text{K}$ , pH = 6.0     | 52.4              | 8         |
| AOMGO                                                             | $T = 298\text{K}$ , pH = 5.0     | 284.9             | 9         |
| SBA-AO-0.4                                                        | $T = 298\text{K}$ , pH = 5.0     | 386.8             | This work |

## References

1. T. Missana, M. Garcia-Gutierrez and V. Fernandez, *Geochim. Cosmochim. Ac.*, 2003, **67**, 2543–2550.
2. P. F. Zong, S. F. Wang, Y. L. Zhao, H. Wang, H. Pan and C. H. He, *Chem. Eng. J.*, 2013, **220**, 45–52.
3. A. Rezaei, H. Khani, M. Masteri-Farahani and M. K. Rofouei, *Anal. Methods*, 2012, **4**, 4107–4114.
4. S. Sadeghi, H. Azhdari, H. Arabi and A. Z. Moghaddam, *J. Hazard. Mater.*, 2012, **215**, 208–216.
5. Y. G. Zhao, J. X. Li, L. P. Zhao, S. W. Zhang, Y. S. Huang, X. L. Wu and X. K. Wang, *Chem. Eng. J.*, 2014, **235**, 275–283.
6. A. Tripathi, J. S. Melo and S. F. D'Souza, *J. Hazard. Mater.*, 2013, **246**, 87–95.
7. S. Sadeghi and E. Aboobakri, *Microchim. Acta*, 2012, **178**, 89–97.
8. F. L. Fan, Z. Qin, J. Bai, W. D. Rong, F. Y. Fan, W. Tian, X. L. Wu, Y. Wang and L. Zhao, *J. Environ. Radioactiv.*, 2012, **106**, 40–46.
9. Y. G. Zhao, J. X. Li, S. W. Zhang, H. Chen and D.D. Shao, *RSC Adv.*, 2013, **3**, 18952–18959.

Table S2 Thermodynamic parameters of U(VI) sorption on SBA-AO-0.4 at 298, 318, and 338 K.

| $T$ (K) | $\Delta G^0$ (kJ/mol) | $\Delta H^0$ (kJ/mol) | $\Delta S^0$ (J/(K mol)) |
|---------|-----------------------|-----------------------|--------------------------|
| 298     | -25.853               |                       |                          |
| 318     | -28.054               | 9.548                 | 118.619                  |
| 338     | -30.613               |                       |                          |
